# Supplementary material
Source: publisher figshare collection journal article supplement (https://acs.figshare.com/ndownloader/files/4385113)
Supplement: Supplementary file 1 [file 4385113]

**Supporting Information for**  
**A Novel Approach for the Simultaneous Determination of Iodide, Iodate and**  
**Organo-iodide for  $^{127}\text{I}$  and  $^{129}\text{I}$  in Environmental Samples Using Gas**  
**Chromatography-Mass Spectrometry**

S. Zhang<sup>a</sup>, K.A. Schwehr<sup>a</sup>, Y.-F. Ho<sup>a</sup>, C. Xu<sup>a</sup>, K. Roberts<sup>b</sup>, D.I. Kaplan<sup>b</sup>, R. Brinkmeyer<sup>a</sup>, C.M.  
Yeager<sup>b</sup>, P. H. Santschi<sup>a</sup>

- a. Department of Oceanography and Marine Science, Texas A&M University,  
Galveston, TX 77551
- b. Savannah River National Laboratory, Aiken SC.

This supporting information has 5 pages and includes 4 figures

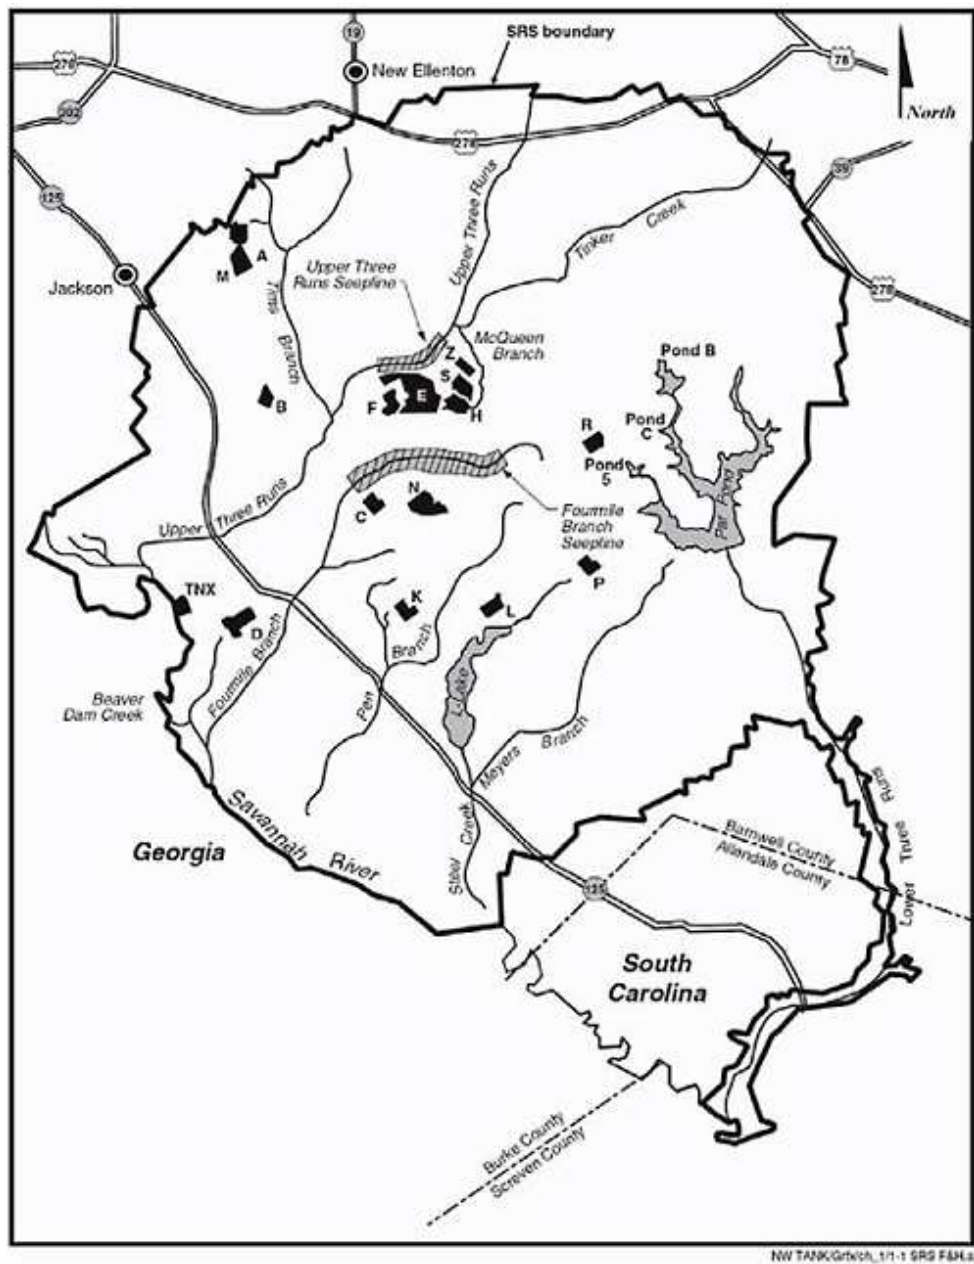

Fig.S1 Map of Savannah River Site (SRS, shaded). Letters represent locations of waste sites at SRS.

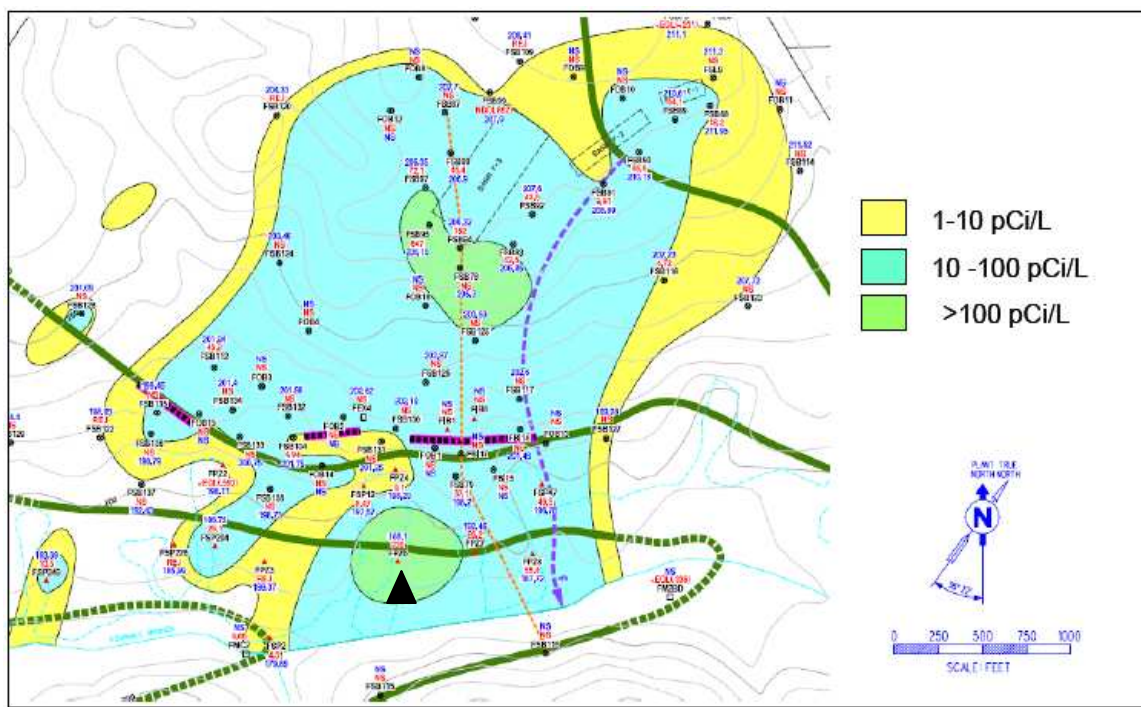

Fig.S2 Map of  $^{129}\text{I}$  in groundwater of F-area. The sampling site for groundwater was well FPZ6A (solid triangle) where is highly  $^{129}\text{I}$  contaminated.



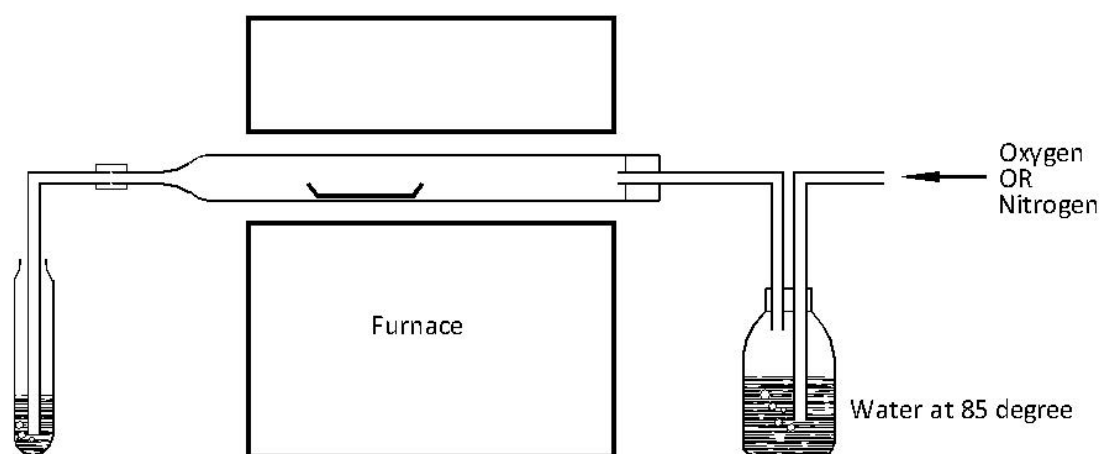

Fig. S4 Skeleton for combustion of aqueous samples or soils to analyze total iodine in environmental samples
